# Supplementary material for: 18F-FDG PET/CT and Urothelial Carcinoma: Impact on Management and Prognosis—A Multicenter Retrospective Study
Source: Cancers (Basel). 2019 May 20;11(5):700. doi: 10.3390/cancers11050700 (PMC6562413; doi:10.3390/cancers11050700)
Supplement: Supplementary file 1 [file cancers-11-00700-s001.pdf]

Supplementary materials

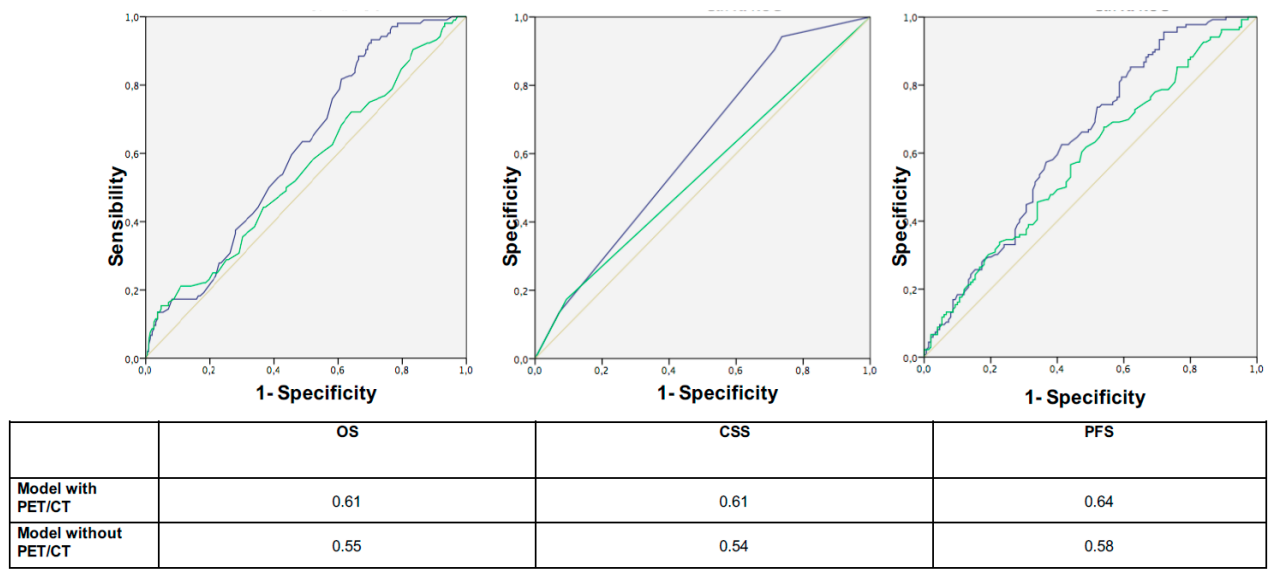

**Figure S1.** ROC curve assessing the accuracy of the multivariable COX model all patients with and without PET/CT (model with only variables set at a p value less than 0.05 in univariate analysis).

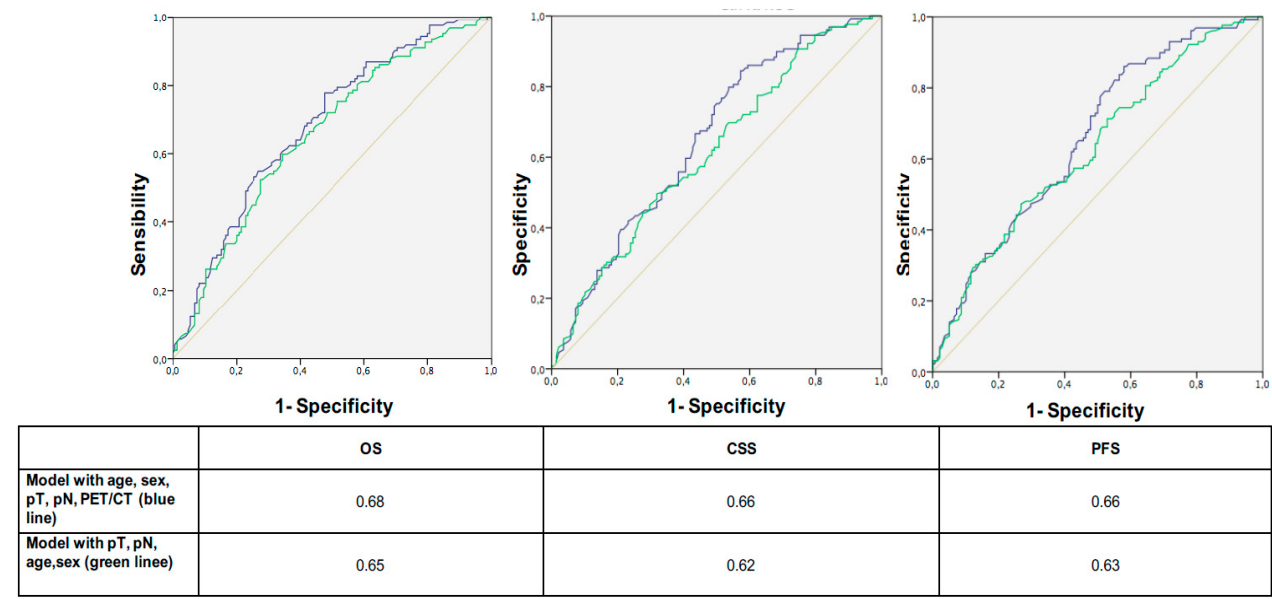

**Figure S2.** ROC curve assessing the accuracy of the multivariable COX model all patients with and without PET/CT (model with the most common clinical-pathological variables).

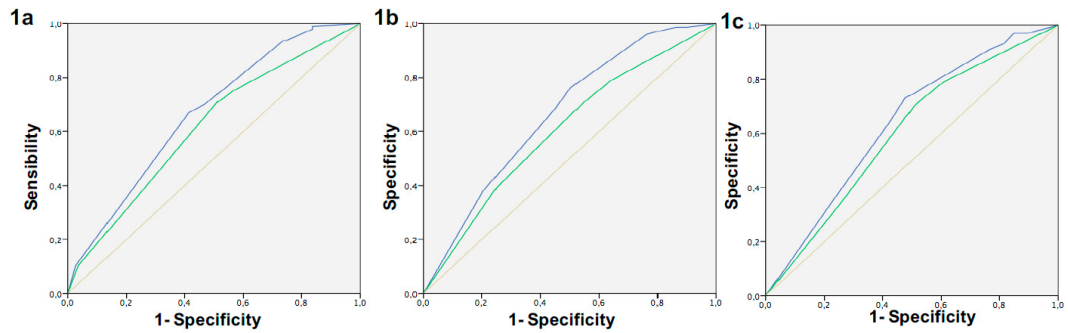

|                                   | OS   | CSS  | PFS  |
|-----------------------------------|------|------|------|
| Model with PET/CT (blue line)     | 0.66 | 0.67 | 0.64 |
| Model without PET/CT (green line) | 0.61 | 0.60 | 0.60 |

**Figure S3.** ROC curve assessing the accuracy of the multivariable COX model for bladder cancer with and without PET/CT (model with only variables set at a p value less than 0.05 an univariate analysis).

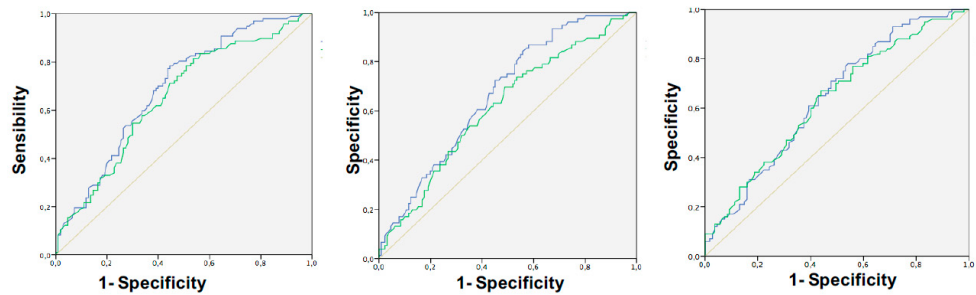

|                                                 | OS   | CSS  | PFS  |
|-------------------------------------------------|------|------|------|
| Model with age, sex, pT, pN, PET/CT (blue line) | 0.69 | 0.67 | 0.64 |
| Model with pT, pN, age, sex (green line)        | 0.65 | 0.61 | 0.63 |

**Figure S4.** ROC curve assessing the accuracy of the multivariable COX model for bladder cancer with and without PET/CT (model with the most common clinical-pathological variables).

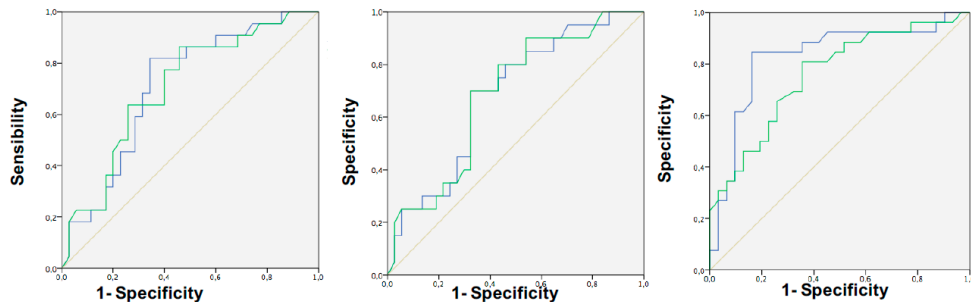

|                                        | OS   | CSS  | PFS  |
|----------------------------------------|------|------|------|
| Model with age, sex, pT, pN and PET/CT | 0.71 | 0.68 | 0.83 |
| Model with pT, pN, age and sex         | 0.70 | 0.68 | 0.76 |

**Figure S5.** ROC curve assessing the accuracy of the multivariable COX model for upper tract tumors with and without PET/CT (model with the most common clinical-pathological variables).

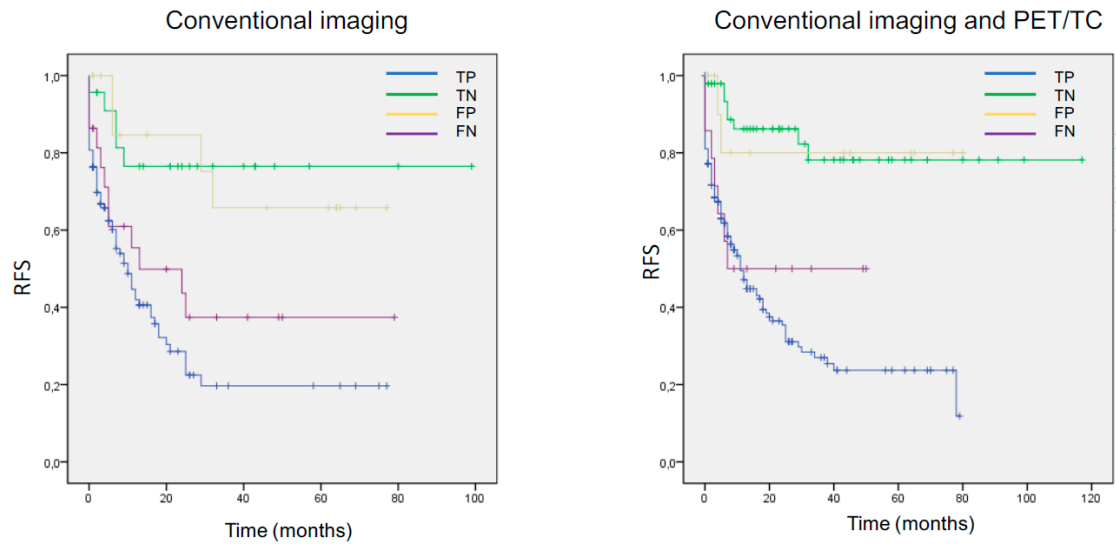

**Figure S6.** PET/CT is able to stratify recurrence free survival for those patients with a FP and FN at conventional imaging.

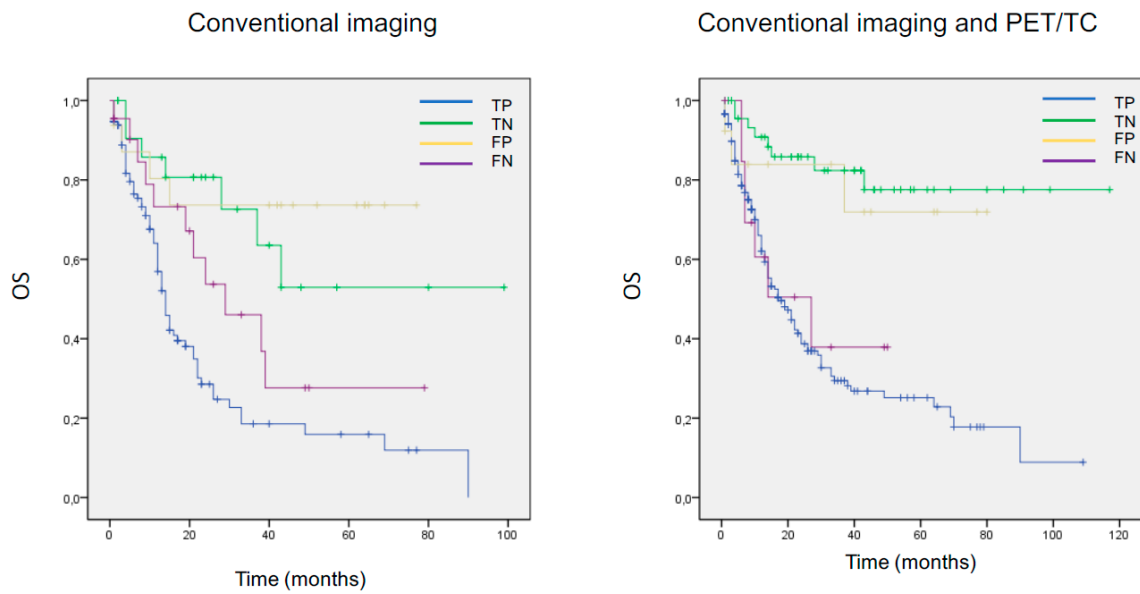

**Figure S7.** PET/CT is able to stratify overall survival for those patients with a FP and FN conventional imaging.

**Table S1a.** Characteristics of patients with only bladder cancer (212/286).

| Variables                                              | No.            |
|--------------------------------------------------------|----------------|
| pT of bladder cancer, n (%)                            |                |
| pT ≤ 2                                                 | 82/212 (40.0)  |
| pT 3–4                                                 | 126/212 (59.4) |
| NA                                                     | 4/212 (1.8)    |
| Tumor grade                                            |                |
| Low Grade                                              | 15/212 (7.0)   |
| High grade                                             | 197/212 (91.0) |
| N/A                                                    | 4/212 (1.8)    |
| pN of bladder cancer, n (%)                            |                |
| pNx                                                    | 3/212 (1.4)    |
| pN0                                                    | 125/212 (59)   |
| pN1                                                    | 29/212 (13.7)  |
| pN2                                                    | 43/212 (20.3)  |
| pN3                                                    | 9/212 (4.2)    |
| NA                                                     | 3/212 (1.4)    |
| Mean of removed Lymph nodes of bladder cancer (IQR)    | 20 (12–27)     |
| Mean of metastatic lymph nodes of bladder cancer (IQR) | 2 (0–1.75)     |
| Neoadjuvant treatments, n (%)                          |                |
| No                                                     | 187/212 (88.2) |
| Yes                                                    | 25/212 (11.8)  |
| Adjuvant treatments, n (%)                             |                |
| No                                                     | 119/212 (56.1) |
| Yes                                                    | 93/212 (43.9)  |
| Type of adjuvant treatments, n (%)                     |                |
| No                                                     | 119/212 (56.1) |
| Chemotherapy                                           | 75/212 (35.4)  |
| Radiotherapy                                           | 17/212 (8)     |
| Combination of chemotherapy and radiotherapy           | 1/212 (0.5)    |

**Table S1b.** Characteristics of patients with only UTUC (38/286).

| Variables                                        | No.          |
|--------------------------------------------------|--------------|
| pT of UUTC (*), n (%)                            |              |
| pT ≤ 2                                           | 13/38 (34.2) |
| pT 3–4                                           | 16/38 (42.1) |
| NA                                               | 9/38 (23.7)  |
| Tumor grade                                      |              |
| Low Grade                                        | 1/38 (2.6)   |
| High grade                                       | 27/38 (96.4) |
| pN of UUTC (*), n (%)                            |              |
| pNx                                              | 19/38 (50.0) |
| pN0                                              | 14/38 (36.8) |
| pN1                                              | 2/38 (5.2)   |
| pN2                                              | 3/38 (7.9)   |
| Mean of removed Lymph nodes of UUTC (*) (IQR)    | 4 (0–8.5)    |
| Mean of metastatic lymph nodes of UUTC (*) (IQR) | 1(1–2)       |
| UUTC (*) location, n (%)                         |              |
| pelvis                                           | 10/38 (26.3) |
| ureter                                           | 23/38 (60.5) |
| multifocality                                    | 5/38 (13.1)  |
| UUTC (*) treatments, n (%)                       |              |
| Nephroureterectomy                               | 35/38 (92.1) |
| Other treatments                                 | 3/38 (7.9)   |
| Neoadjuvant treatments, n (%)                    |              |
| No                                               | 33/38 (86.8) |
| Yes                                              | 5/38 (13.1)  |
| Adjuvant treatments, n (%)                       |              |
| No                                               | 30/38 (78.9) |
| Yes                                              | 8/38 (21.1)  |
| Type of adjuvant treatments, n (%)               |              |
| No                                               | 30/38 (72.2) |
| Chemotherapy                                     | 7/38 (18.4)  |
| Radiotherapy                                     | 0            |
| Combination of chemotherapy and radiotherapy     | 1/38 (2.6)   |

\* Upper urinary tract carcinoma.

**Table S1c.** Characteristics of patients with concomitant bladder cancer and UTUC (36/286).

| Variables                                              | No.          |
|--------------------------------------------------------|--------------|
| Radical cystectomy, n (%)                              |              |
| Open cystectomy                                        | 35/36 (97.2) |
| Robotic cystectomy                                     | 1/36 (2.8)   |
| pT of bladder cancer, n (%)                            |              |
| pT ≤ 2                                                 | 21/36 (58.3) |
| pT 3–4                                                 | 11/36 (30.5) |
| NA                                                     | 4/36 (11.1)  |
| Tumor grade                                            |              |
| Low Grade                                              | 2/36 (5.5)   |
| High grade                                             | 30/36 (83.3) |
| N/A                                                    | 4/36 (11.1)  |
| pN of bladder cancer, n (%)                            |              |
| pNx                                                    | 1/36 (2.8)   |
| pN0                                                    | 22/36 (61.1) |
| pN1                                                    | 4/36 (11.1)  |
| pN2                                                    | 4/36 (11.1)  |
| pN3                                                    | 1/36 (2.8)   |
| NA                                                     | 4/36 (11.1)  |
| Mean of removed Lymph nodes of bladder cancer (IQR)    | 20 (12–27)   |
| Mean of metastatic lymph nodes of bladder cancer (IQR) | 1 (0–1)      |
| pT of UUTC (*), n (%)                                  |              |
| pT ≤ 2                                                 | 17/36 (47.2) |
| pT 3–4                                                 | 12/36 (33.3) |
| NA                                                     | 7/36 (19.4)  |
| pN of UUTC (*), n (%)                                  |              |
| pNx                                                    | 31/36(86.1)  |
| pN0                                                    | 4/36(11.1)   |
| pN1                                                    | 1/36 (2.8)   |
| Mean of removed Lymph nodes of UUTC (*) (IQR)          | 10 (0–16)    |
| Mean of metastatic lymph nodes of UUTC (*) (IQR)       | 1 (1–2)      |
| UUTC (*) location, n (%)                               |              |
| pelvis                                                 | 20/36 (55.5) |
| ureter                                                 | 9/36 (25)    |
| multifocality                                          | 7/36 (19.4)  |
| UUTC (*) treatments, n (%)                             |              |
| Nephroureterectomy                                     | 31/36 (86.1) |
| Other treatments                                       | 5/36 (13.9)  |
| Neoadjuvant treatments, n (%)                          |              |
| No                                                     | 31/36 (86.1) |
| Yes                                                    | 5/36 (13.9)  |
| Adjuvant treatments, n (%)                             |              |
| No                                                     | 26/36 (72.2) |
| Yes                                                    | 10/36 (27.8) |
| Type of adjuvant treatments, n (%)                     |              |
| No                                                     | 26/36 (72.2) |
| Chemotherapy                                           | 7/36 (19.4)  |
| Radiotherapy                                           | 2/36 (5.6)   |
| Combination of chemotherapy and radiotherapy           | 1/36 (2.8)   |

\* Upper urinary tract carcinoma.
